# Supplementary material for: Muscle and adipose tissue morphology, insulin sensitivity and beta-cell function in diabetic and nondiabetic obese patients: effects of bariatric surgery
Source: PubMed Central journal article supplement (PMC5566429; doi:10.1038/s41598-017-08444-6), 2017-08-21
Supplement: 41598_2017_8444_MOESM1_ESM.pdf [file 41598_2017_8444_MOESM1_ESM.pdf]

**Muscle and adipose tissue morphology, insulin sensitivity and beta-cell function in diabetic and nondiabetic obese patients: effects of bariatric surgery.**

**Camastra S\*, Vitali A, Anselmino M, Gastaldelli A, Bellini R, Berta R, Severi I, Baldi S, Astiarraga B, Barbatelli G, Cinti S, Ferrannini E.**

**Supplemental Table S1 – Changes in anthropometric and metabolic parameters.**

|                                                                                  | ND          |                       |             | T2D         |                       |             |
|----------------------------------------------------------------------------------|-------------|-----------------------|-------------|-------------|-----------------------|-------------|
|                                                                                  | Baseline    | <i>p</i> <sup>§</sup> | 1 year      | Baseline    | <i>p</i> <sup>§</sup> | 1 year      |
| Number (F/M)                                                                     | 8 (7/1)     |                       | 8 (7/1)     | 11 (7/4)    |                       | 11 (7/4)    |
| Body weight (kg)                                                                 | 140 ± 8     | 0.01                  | 97 ± 6      | 138 ± 8     | 0.003                 | 92 ± 5      |
| BMI (kg·m <sup>-2</sup> )                                                        | 50.4 ± 2.0  | 0.01                  | 34.9 ± 1.4  | 50.5 ± 2.6  | 0.003                 | 33.8 ± 1.6  |
| FM (%)                                                                           | 50.4 ± 1.9  | 0.01                  | 39.5 ± 2.1  | 46.2 ± 2.6  | 0.003                 | 33.1 ± 2.8  |
| FM (kg)                                                                          | 69.9 ± 5.2  | 0.01                  | 38.2 ± 3.1  | 63.6 ± 5.6  | 0.003                 | 31.0 ± 3.5  |
| FFM (kg)                                                                         | 69.8 ± 4.7  | 0.01                  | 58.5 ± 4.3  | 73.9 ± 5.9  | 0.008                 | 61.1 ± 3.3  |
| Fasting glucose (mmol/l)                                                         | 5.7 ± 0.1   | 0.01                  | 4.9 ± 0.1   | 9.1 ± 0.9   | 0.003                 | 5.4 ± 0.2*  |
| Fasting insulin (pmol/L)                                                         | 130 [116]   | 0.01                  | 45 [22]     | 137 [126]   | 0.003                 | 49 [26]     |
| Plasma NEFA (mmol/L)                                                             | 0.61 [0.26] | ns                    | 0.57 [0.28] | 0.67 [0.11] | ns                    | 0.68 [0.07] |
| Total cholesterol (mmol/L)                                                       | 4.6 [1.2]   | ns                    | 4.1 [0.9]   | 4.3 [0.9]   | ns                    | 4.0 [0.9]   |
| Triacylglycerols (mmol/L)                                                        | 1.3 [1.1]   | 0.03                  | 0.8 [0.5]   | 1.3 [0.6]   | 0.02                  | 1.0 [0.1]   |
| HDL-cholesterol (mmol/L)                                                         | 1.3 [0.1]   | ns                    | 1.5 [0.1]   | 1.1 [0.1]   | ns                    | 1.1 [0.1]   |
| Adiponectin (ng/ml)                                                              | 6.5 ± 1.0   | 0.02                  | 11.2 ± 1.8  | 6.1 ± 1.6   | 0.01                  | 13.0 ± 3.2  |
| MCP-1 (pg/ml)                                                                    | 250 [144]   | 0.05                  | 161 [57]    | 271 [147]   | ns                    | 270 [129]   |
| IL-6 (pg/ml)                                                                     | 3.49 [2.12] | 0.05                  | 1.68 [1.28] | 6.09 [4.32] | 0.01                  | 2.21 [1.63] |
| TNFα (pg/ml)                                                                     | 1.10 [0.58] | ns                    | 1.00 [0.58] | 1.18 [0.50] | ns                    | 1.09 [0.43] |
| M/I (nmol·min <sup>-1</sup> ·kg <sub>FFM</sub> <sup>-1</sup> ·pM <sup>-1</sup> ) | 38.3 [24.7] | 0.01                  | 69.5 [22.9] | 23.7 [26.7] | 0.003                 | 87.6 [41.3] |
| RaGly (μmol·min <sup>-1</sup> )                                                  | 353 [206]   | ns                    | 227 [142]   | 349 [54]    | 0.03                  | 275 [113]   |
| AT-IR (mmol·min <sup>-1</sup> ·kg <sub>FM</sub> <sup>-1</sup> ·pM)               | 0.53 [1.17] | 0.05                  | 0.26 [0.25] | 0.86 [0.93] | 0.03                  | 0.44 [0.26] |
| Mean Glucose (mmol/L)                                                            | 6.0 ± 0.2   | ns                    | 5.9 ± 0.1   | 9.3 ± 0.9   | 0.003                 | 6.4 ± 1.0*  |
| β-GS (pmol·min <sup>-1</sup> ·m <sup>-2</sup> ·mM <sup>-1</sup> )                | 138 [50]    | 0.02                  | 92 [18]     | 27 [24]     | 0.007                 | 64 [38]*    |
| Total insulin output (nmol·m <sup>-2</sup> )                                     | 86 [32]     | ns                    | 68 [29]     | 57 [43]     | ns                    | 59 [30]     |
| Fasting ISR (pmol·min <sup>-1</sup> ·m <sup>-2</sup> )                           | 140 [80]    | 0.02                  | 63 [21]     | 100 [80]    | 0.05                  | 70 [29]     |

<sup>§</sup> *p* for the changes at 1 year vs baseline by Wilcoxon sign rank test; \* *p* ≤ 0.05 for the between-group difference at 1 year.
